# Supplementary material for: Revealing the key factors affecting the anode performance of metal-ion batteries: a case study of boron carbide monolayers
Source: Royal Society of Chemistry journal article supplement (doi:10.1039/d4ta05757k), 2024-01-01
Supplement: d4ta05757k1.pdf [file d4ta05757k1.pdf]

## Supporting Information

### **Revealing the key factors affecting the anode performance of metal-ion batteries: a case study of boron carbide monolayers**

Shicong Ding<sup>1</sup>, Xu Yan<sup>1</sup>, Javed Rehman<sup>2,\*</sup>, Sheng Wang<sup>1</sup>, Yong Liu<sup>1</sup>, and Guochun Yang<sup>1,3\*</sup>

*<sup>1</sup>State Key Laboratory of Metastable Materials Science & Technology and Key Laboratory for Microstructural Material Physics of Hebei Province, School of Science, Yanshan University, Qinhuangdao 066004, China*

*<sup>2</sup>State Key Laboratory of Metastable Materials Science and Technology, School of Materials Science and Engineering, Yanshan University, Qinhuangdao 066004, China*

*<sup>3</sup>Centre for Advanced Optoelectronic Functional Materials Research and Key Laboratory for UV Light-Emitting Materials and Technology of Northeast Normal University, Changchun 130024, China*

Corresponding Authors: [javedk15@ysu.edu.cn](mailto:javedk15@ysu.edu.cn) and [yanggc468@nenu.edu.cn](mailto:yanggc468@nenu.edu.cn)

| <b>Index</b>                                                                                                                                                                                                  | <b>Page</b> |
|---------------------------------------------------------------------------------------------------------------------------------------------------------------------------------------------------------------|-------------|
| 1. Computational details·····                                                                                                                                                                                 | 3           |
| 2. The planar average potential as a function of the distance along the <i>c</i> -axis for five B–C monolayers·····                                                                                           | 4           |
| 3. Crystal structure, phonon spectrum, Young’s modulus and Poisson’s ratio of BC <sub>7</sub> and BC <sub>9</sub> monolayers·····                                                                             | 5           |
| 4. AIMD simulations for five B–C monolayers·····                                                                                                                                                              | 6           |
| 5. Projected band structure of BC <sub>7</sub> and BC <sub>9</sub> monolayers ·····                                                                                                                           | 7           |
| 6. Charge density of BC <sub>7</sub> , BC <sub>8</sub> , BC <sub>9</sub> , and BC <sub>11</sub> ·····                                                                                                         | 8           |
| 7. Ion migration paths and barriers for the BC <sub>8</sub> , BC <sub>9</sub> , and BC <sub>11</sub> monolayers·····                                                                                          | 9           |
| 8. K ions migration paths and barriers for the BC <sub>7</sub> monolayer·····                                                                                                                                 | 10          |
| 9. ELF snapshots of K loaded on BC <sub>6</sub> , BC <sub>7</sub> , BC <sub>9</sub> , and BC <sub>11</sub> , respectively ·····                                                                               | 11          |
| 10. OCV as a function of K concentration in BC <sub>6</sub> , BC <sub>7</sub> , BC <sub>9</sub> , and BC <sub>11</sub> , respectively·····                                                                    | 12          |
| 11. AIMD simulations of K <sub>4</sub> BC <sub>6</sub> , K <sub>5</sub> BC <sub>7</sub> , K <sub>7</sub> BC <sub>8</sub> , K <sub>7</sub> BC <sub>9</sub> , and K <sub>8</sub> BC <sub>11</sub> at 300 K····· | 13          |
| 12. Structural information of the five B–C monolayers ·····                                                                                                                                                   | 14          |
| 13. Comparison of five B–C monolayers with reported 2D materials for cohesion energy·····                                                                                                                     | 16          |
| 14. The elastic constants, average Young’s modulus, and average Poisson’s ratios of the five B–C monolayers ·····                                                                                             | 17          |
| 15. The variation of lattice constants of the K adsorbed five B–C monolayers as a function of K concentration·····                                                                                            | 18          |
| 16. The elastic constants, average Young’s modulus, and average Poisson’s ratios of the five fully potassiated B–C monolayers·····                                                                            | 19          |
| 17. References ·····                                                                                                                                                                                          | 20          |

## Computational Details

The particle swarm optimization (PSO) method, integrated within the evolutionary algorithm and implemented in the Crystal structure AnaLYsis by Particle Swarm Optimization (CALYPSO) code,<sup>1, 2</sup> was employed to identify the lowest-energy structures of  $B_yC_x$  ( $x = 3-12, y = 1; x = 3, 5, 7, 9, 11, y = 2$ ). Specifically, the number of layers was set to 1, the layer thickness was set to 0.2 Å, and a vacuum layer of 20 Å along the  $c$ -axis was introduced to prevent interlayer interactions, which were consistent with previously reported values.<sup>3, 4</sup> Initially, random structures with specific symmetry were generated, where atomic coordinates were produced through crystallographic symmetry operations. Subsequent local optimizations were performed using the VASP code,<sup>5, 6</sup> under a version with a fixed  $c$ -axis, employing the conjugate gradients method and terminating when the total energy changes fell below  $1 \times 10^{-5}$  eV per cell. Following the processing of the initial generation structures, 60% of those with lower enthalpies were selected to generate the subsequent generation structures via PSO. Additionally, 40% of the structures in the new generation were randomly created. Structural searches were carried out for 1–4 formula units, with a maximum of 30 atoms. Each generation consisted of 40 structures, and the calculations were iterated over at least 20 generations.

The scanning potential energy surface was constructed by calculating the energy of a single K atom at various positions above the B–C monolayer. A Python script<sup>7</sup> was employed to automatically generate these positions, using the relaxed CONTCAR file of the optimal adsorption site within a  $2 \times 2$  supercell as the input to determine the ideal adsorption height. For the  $BC_6$  and  $BC_8$  monolayers, 12 positions were generated in both the  $x$  and  $y$  directions, resulting in a total of 144 positions. Additionally, for the  $BC_{11}$  monolayer, 12 positions were generated in the  $x$  direction and 8 in the  $y$  direction, totaling 96 positions. Relaxation for each position was performed using VASP code.<sup>5, 6</sup> Given that most sites are not conducive to K atom adsorption, the K atom was constrained to move only vertically to achieve adsorption equilibrium. Upon completing the calculations, the Python script extracted the data and plotted the potential energy surface by calculating the energy differences between each site and the optimal adsorption site.

## Supplementary Figures

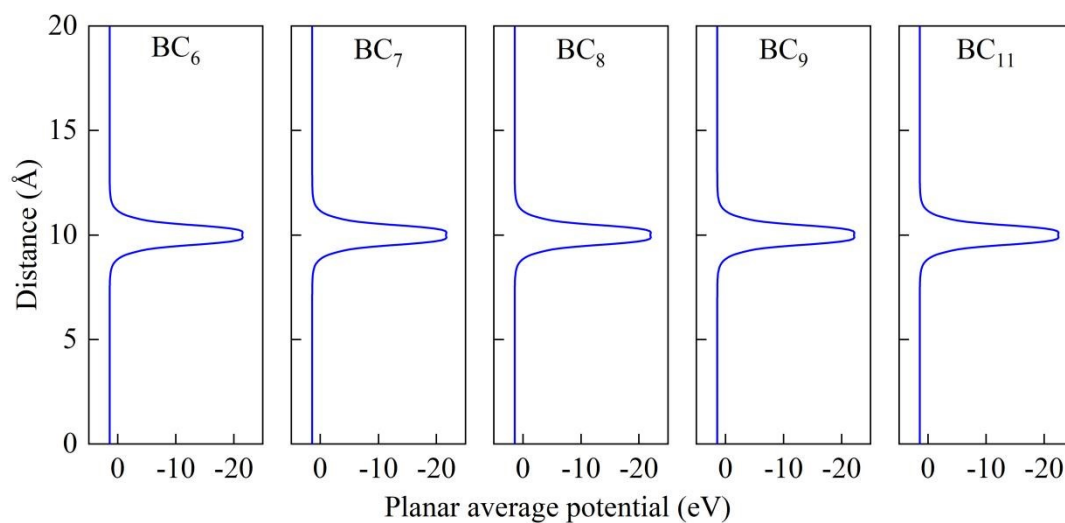

**Fig. S1** The planar average potential as a function of the distance along the  $c$ -axis for five B–C monolayers. Only the B–C layer (located at 10 Å) exhibits an obvious planar average potential, while the vacuum layer is flat, which indicates that there is no interlayer interaction between adjacent layers.

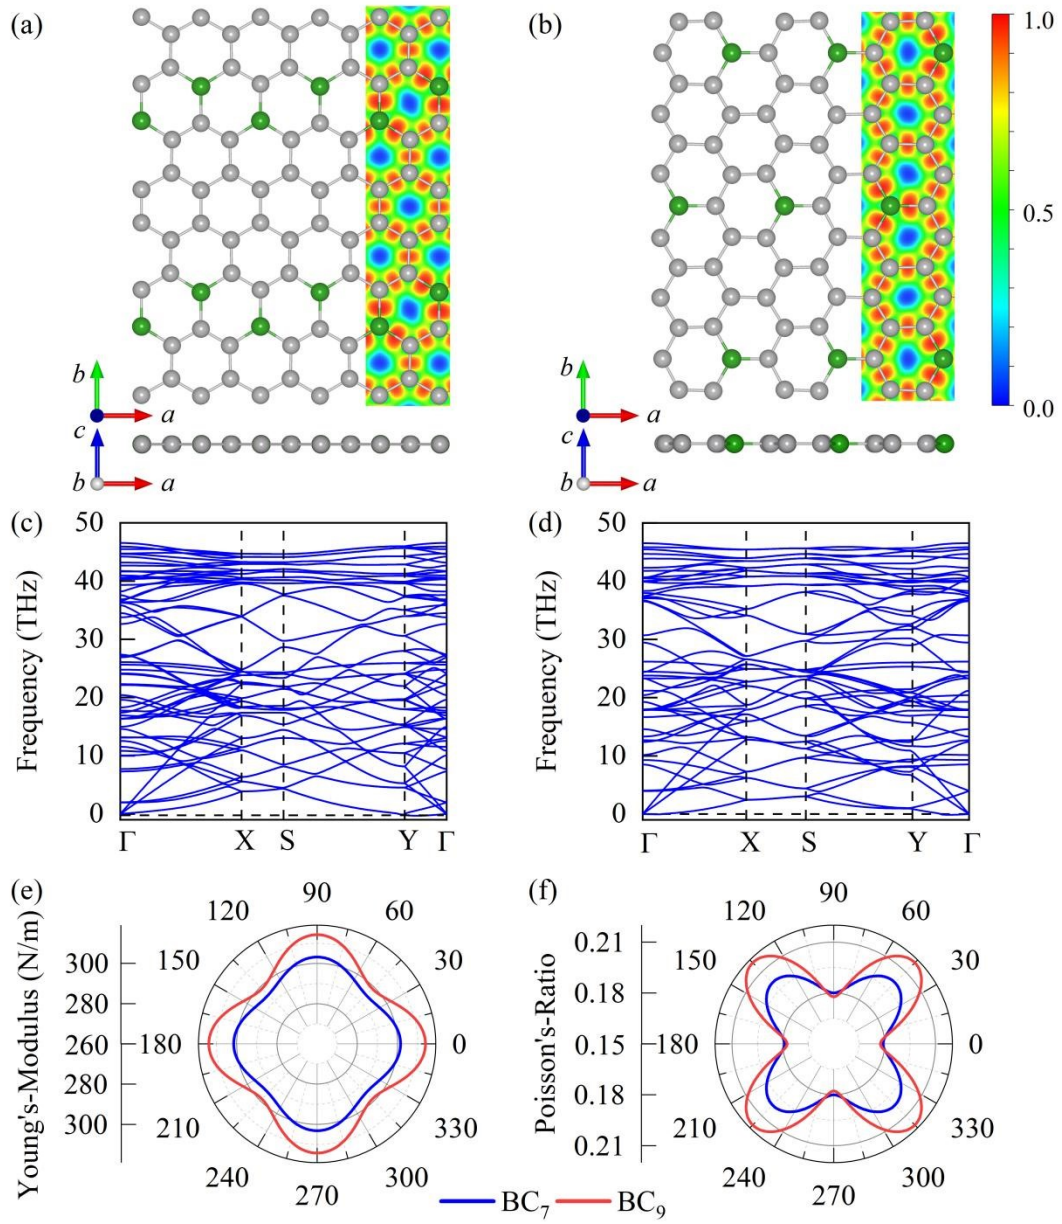

**Fig. S2** (a)-(b) Crystal structures and (c)-(d) phonon spectra of BC<sub>7</sub> and BC<sub>9</sub> monolayers, respectively. The structures also include the electron local function (ELF). (e) represents their Young's modulus, and (f) represents their Poisson's ratio.

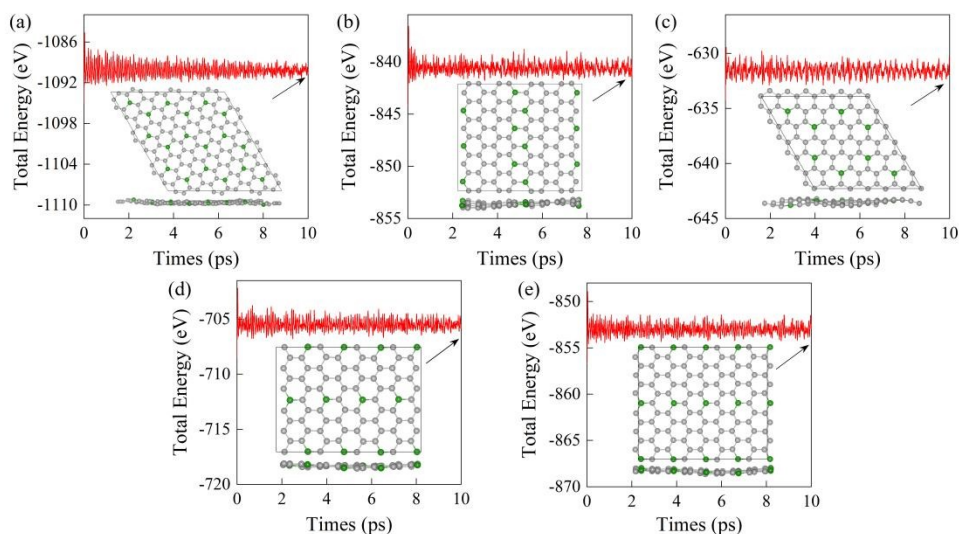

**Fig. S3** AIMD simulations for (a) BC<sub>6</sub>, (b) BC<sub>7</sub>, (c) BC<sub>8</sub>, (d) BC<sub>9</sub>, and (e) BC<sub>11</sub> monolayers at 300 K. The inset gives top and side view of the structure after 10 ps.

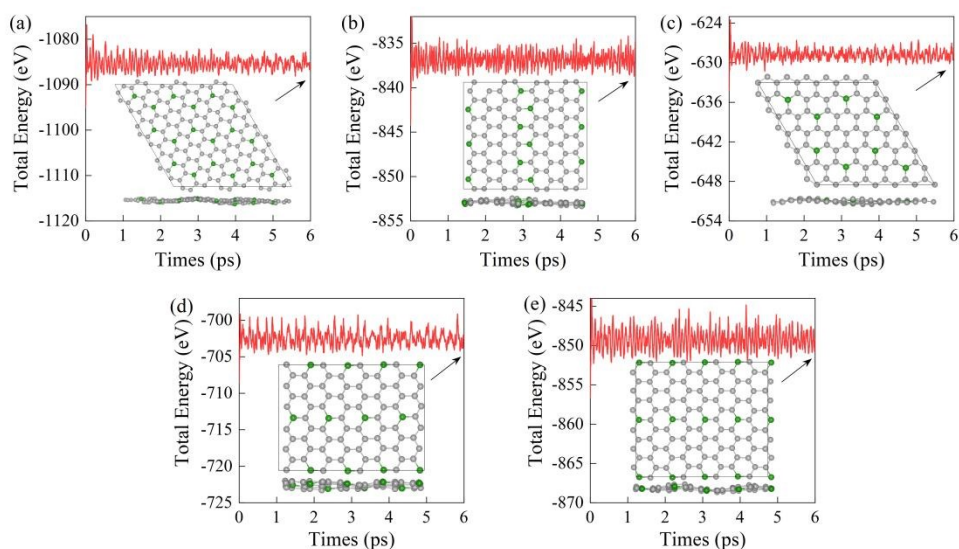

**Fig. S4** AIMD simulations for (a) BC<sub>6</sub>, (b) BC<sub>7</sub>, (c) BC<sub>8</sub>, (d) BC<sub>9</sub>, and (e) BC<sub>11</sub> monolayers at 600 K. The inset gives top and side view of the structure after 6 ps. Total energy remains equilibrium and the structures are not fractured or collapsed, indicating that they are thermal stable.

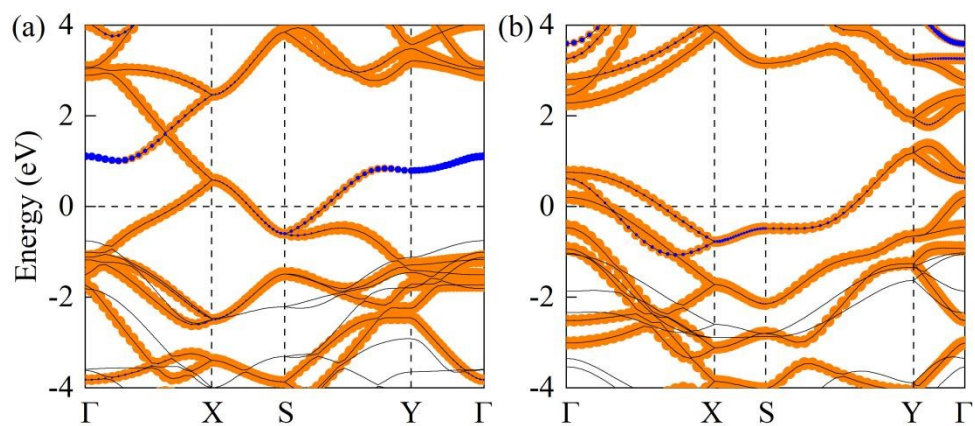

**Fig. S5** Projected band structures of (a) BC<sub>7</sub> and (b) BC<sub>9</sub> monolayers. The metallic property is mainly contributed by the  $p_z$  orbitals, hence here only the  $p_z$  orbitals of C (yellow) and B (blue) are given.

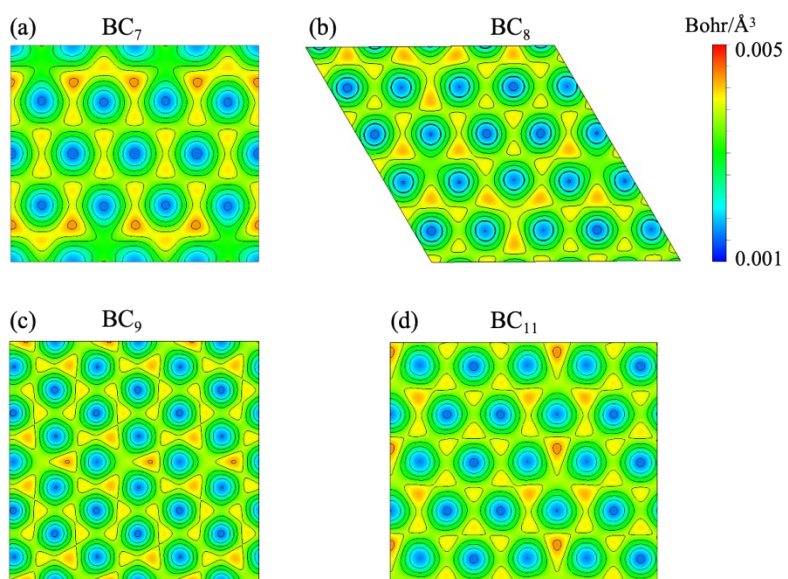

**Fig. S6** Charge density in the plane 1.6 Å above the sheet for (a) BC<sub>7</sub>, (b) BC<sub>8</sub>, (c) BC<sub>9</sub>, and (d) BC<sub>11</sub>, respectively.



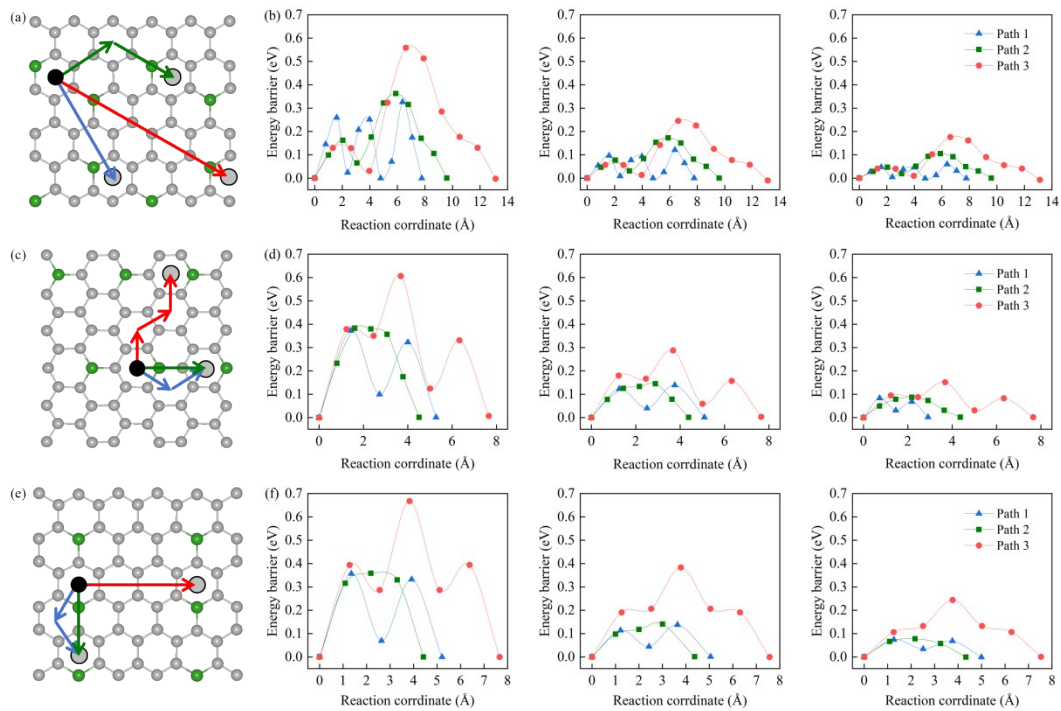

**Fig. S7** Ion migration paths on the (a)  $BC_8$  and (c)  $BC_9$  and (e)  $BC_{11}$  monolayers. Green, red, and blue indicate different paths. The corresponding CI-NEB migration barriers of Li, Na, and K across three paths are depicted in (b), (d), and (f). The blue path has the lowest barrier, with Li, Na, and K ion migration energy barriers of 0.33, 0.12, and 0.06 eV for  $BC_8$ , 0.37, 0.14, and 0.08 eV for  $BC_9$  and 0.36, 0.14, and 0.07 eV for  $BC_{11}$ , respectively.

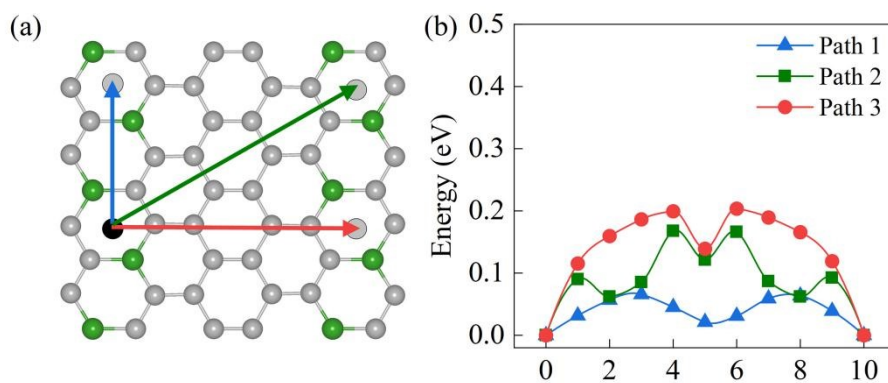

**Fig. S8** (a) The migration pathways of K ions and (b) their corresponding CI-NEB migration barriers for the three pathways in BC<sub>7</sub>. The Path 1 (in blue) represents the minimum K-ion migration path with migration energy barrier of 0.07 eV. It is noted that the BC<sub>7</sub> most stable adsorption site is on the center of B<sub>2</sub>C<sub>4</sub> ring, and the optimal migration path is also along the center of B<sub>2</sub>C<sub>4</sub> rings.

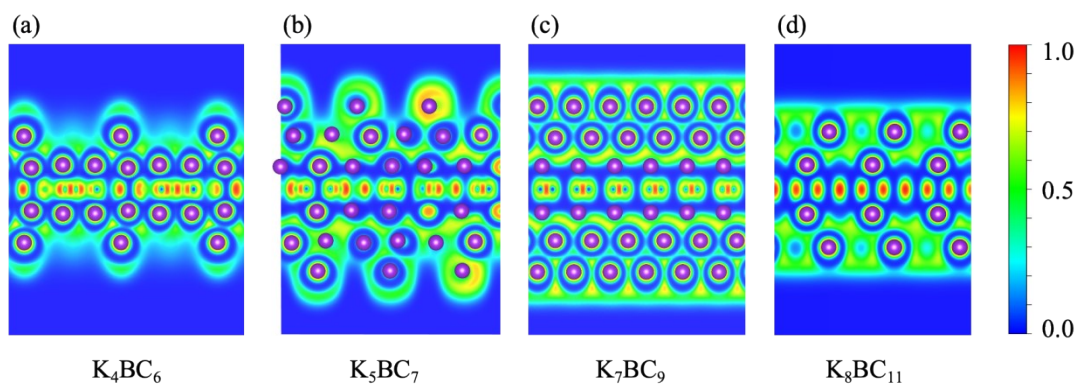

**Fig. S9** ELF snapshots of K loaded on (a)  $K_4BC_6$ , (b)  $K_5BC_7$ , (c)  $K_7BC_9$ , and (d)  $K_8BC_{11}$ , respectively. There is significant localization of the electrons between the K ions, which act as anionic electrons to minimize the repulsion between the K ions, thereby increasing the theoretical capacity.

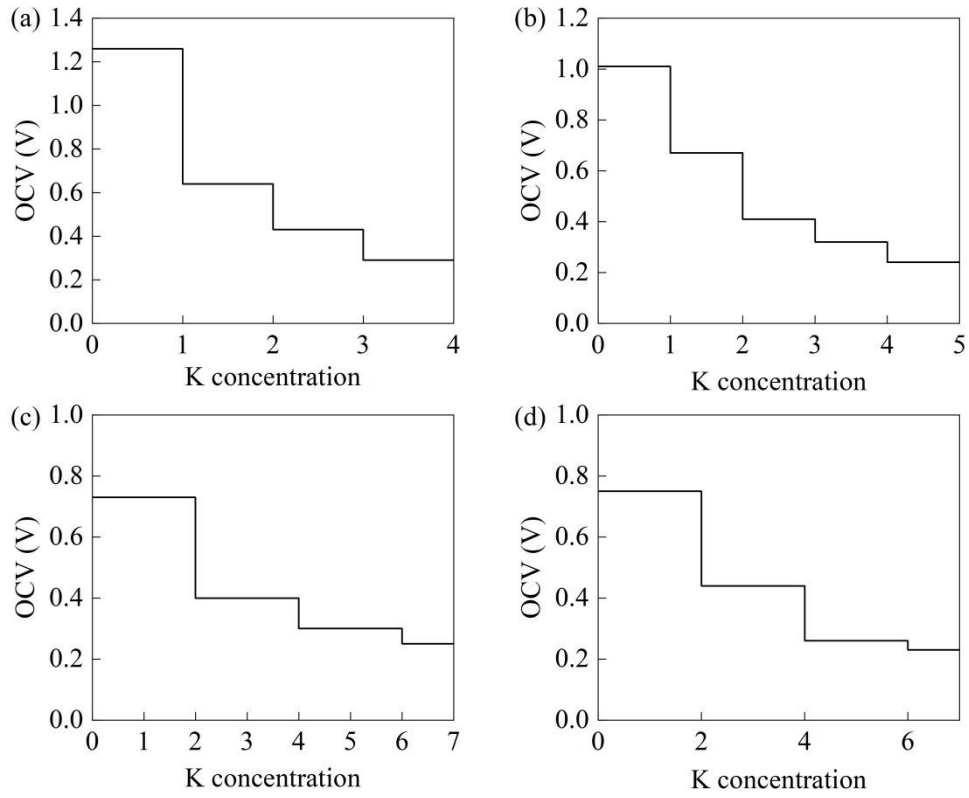

**Fig. S10** OCV as a function of K concentration in (a) BC<sub>6</sub>, (b) BC<sub>7</sub>, (c) BC<sub>9</sub>, and (d) BC<sub>11</sub>, respectively.

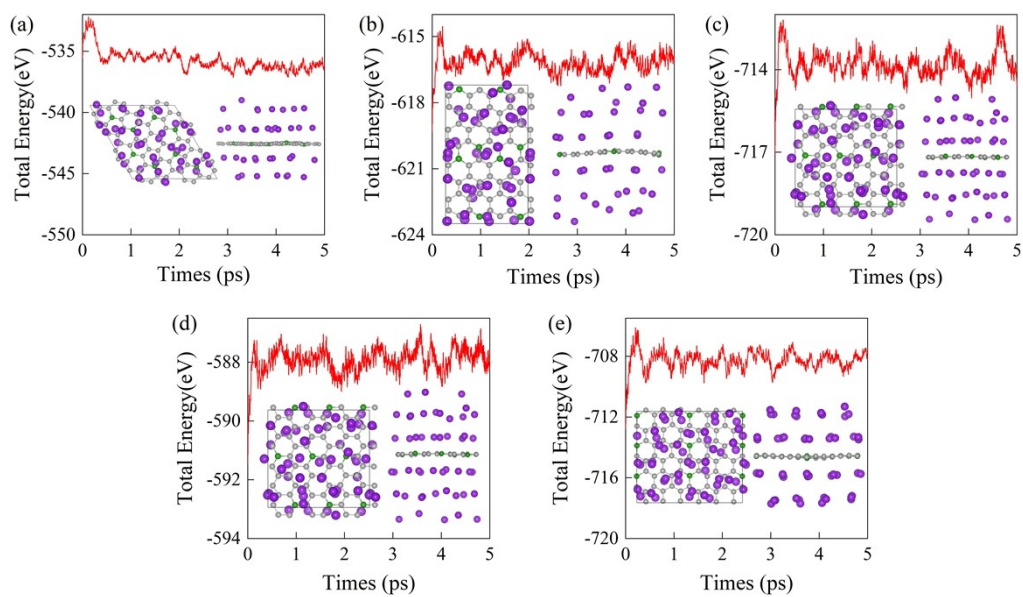

**Fig. S11** AIMD simulations of  $K_4BC_6$ ,  $K_5BC_7$ ,  $K_7BC_8$ ,  $K_7BC_9$ , and  $K_8BC_{11}$  at 300 K. The inset gives top and side view of the structure after 5 ps.

## Supplementary Tables

**Table S1** Structural information of the five B–C monolayers.

|                  | Space group  | Lattice Parameters                                                  | Wyckoff Positions (fractional) |          |          |          |
|------------------|--------------|---------------------------------------------------------------------|--------------------------------|----------|----------|----------|
|                  |              |                                                                     | Atoms                          | <i>x</i> | <i>y</i> | <i>z</i> |
| BC <sub>6</sub>  | <i>P6/m</i>  | <i>a</i> = <i>b</i> = 6.6889 Å<br><i>c</i> = 20.0000 Å              | B (2 <i>d</i> )                | 0.33333  | 0.66667  | 0.50000  |
|                  |              |                                                                     | C <sub>1</sub> (6 <i>k</i> )   | 0.76909  | 0.80564  | 0.50000  |
|                  |              |                                                                     | C <sub>2</sub> (6 <i>k</i> )   | 0.91432  | 0.53130  | 0.50000  |
| BC <sub>7</sub>  | <i>Pmma</i>  | <i>a</i> = 5.0404 Å<br><i>b</i> = 20.0000 Å<br><i>c</i> = 8.7524 Å  | B (2 <i>f</i> )                | 0.75000  | 0.50000  | -0.08341 |
|                  |              |                                                                     | C <sub>1</sub> (2 <i>f</i> )   | 0.75000  | 0.50000  | -0.90458 |
|                  |              |                                                                     | C <sub>2</sub> (2 <i>f</i> )   | 0.75000  | 0.50000  | -0.41753 |
|                  |              |                                                                     | C <sub>3</sub> (2 <i>f</i> )   | 0.75000  | 0.50000  | -0.57941 |
|                  |              |                                                                     | C <sub>4</sub> (4 <i>j</i> )   | 0.50746  | 0.50000  | -0.82478 |
| BC <sub>8</sub>  | <i>P-6m2</i> | <i>a</i> = <i>b</i> = 7.5423 Å<br><i>c</i> = 20.0000 Å              | B <sub>1</sub> (1 <i>f</i> )   | 0.66667  | 0.33333  | 0.50000  |
|                  |              |                                                                     | B <sub>2</sub> (1 <i>d</i> )   | 0.33333  | 0.66667  | 0.50000  |
|                  |              |                                                                     | C <sub>1</sub> (6 <i>m</i> )   | 0.66785  | 0.99859  | 0.50000  |
|                  |              |                                                                     | C <sub>2</sub> (3 <i>k</i> )   | 0.56470  | 0.78235  | 0.50000  |
|                  |              |                                                                     | C <sub>3</sub> (1 <i>b</i> )   | 0.00000  | 0.00000  | 0.50000  |
|                  |              |                                                                     | C <sub>4</sub> (3 <i>k</i> )   | 0.22208  | 0.11104  | 0.50000  |
|                  |              |                                                                     | C <sub>5</sub> (3 <i>k</i> )   | 0.89720  | 0.44860  | 0.50000  |
| BC <sub>9</sub>  | <i>Amm2</i>  | <i>a</i> = 20.0000 Å<br><i>b</i> = 12.5524 Å<br><i>c</i> = 4.3433 Å | B (2 <i>b</i> )                | 0.50000  | 0.00000  | -0.88377 |
|                  |              |                                                                     | C <sub>1</sub> (2 <i>b</i> )   | 0.50000  | 0.00000  | -0.23045 |
|                  |              |                                                                     | C <sub>2</sub> (4 <i>e</i> )   | 0.50000  | 0.29739  | -0.37703 |
|                  |              |                                                                     | C <sub>3</sub> (4 <i>e</i> )   | 0.50000  | 0.39874  | -0.88453 |
|                  |              |                                                                     | C <sub>4</sub> (4 <i>e</i> )   | 0.50000  | 0.19966  | -0.21179 |
| BC <sub>11</sub> | <i>Pmm2</i>  | <i>a</i> = 7.5152 Å                                                 | B (1 <i>b</i> )                | 0.00000  | 0.50000  | -0.90610 |

|                           |             |         |         |          |
|---------------------------|-------------|---------|---------|----------|
| $b = 20.0000 \text{ \AA}$ | $C_1 (1 b)$ | 0.00000 | 0.50000 | -0.56093 |
| $c = 4.3269 \text{ \AA}$  | $C_2 (2 f)$ | 0.83037 | 0.50000 | -0.40628 |
|                           | $C_3 (2 f)$ | 0.33507 | 0.50000 | -0.57926 |
|                           | $C_4 (2 f)$ | 0.82515 | 0.50000 | -0.07969 |
|                           | $C_5 (2 f)$ | 0.66310 | 0.50000 | -0.91249 |
|                           | $C_6 (1 d)$ | 0.50000 | 0.50000 | -0.41294 |
|                           | $C_7 (1 d)$ | 0.50000 | 0.50000 | -0.07828 |

---

**Table S2** Comparison of five B–C monolayers with reported 2D materials for cohesion energy ( $E_{\text{coh}}$ ).

|                        | $E_{\text{coh}}$<br>(eV/atom) | Ref.       |
|------------------------|-------------------------------|------------|
| Silicene               | –3.71                         | 8,9        |
| Phosphorene            | –3.61                         | 10,11      |
| $\text{C}_5\text{N}_2$ | –6.74 ~ –6.78                 | 12         |
| $\text{BC}_3$          | –8.33                         | 13         |
| $\text{B}_4\text{C}_3$ | –6.89                         | 14         |
| $\text{B}_3\text{C}_2$ | –6.83 ~ –6.87                 |            |
| $\text{B}_2\text{C}$   | –6.75                         |            |
| $\text{B}_4\text{C}$   | –6.46                         |            |
| $\text{BC}_7$          | –8.66                         | 15-17      |
| $\text{B}_5\text{C}_8$ | –7.68                         | 4          |
| $\text{BC}_6$          | –8.61                         | This study |
| $\text{BC}_7$          | –8.72                         | This study |
| $\text{BC}_8$          | –8.73                         | This study |
| $\text{BC}_9$          | –8.78                         | This study |
| $\text{BC}_{11}$       | –8.84                         | This study |



**Table S3** The elastic constants ( $C_{ij}$  in N/m), average Young's modulus ( $E$  in N/m), and average Poisson's ratios ( $\nu$ ) of the five B–C monolayers. The values of  $C_{ij}$  satisfy the Born criteria, indicating mechanical stability.

|                  | $C_{11}$ | $C_{12}$ | $C_{22}$ | $C_{66}$ | $E$    | $\nu$ |
|------------------|----------|----------|----------|----------|--------|-------|
| BC <sub>6</sub>  | 300.27   | 65.89    | 300.27   | 117.20   | 285.82 | 0.22  |
| BC <sub>7</sub>  | 311.50   | 56.08    | 313.22   | 122.55   | 298.31 | 0.19  |
| BC <sub>8</sub>  | 315.29   | 62.78    | 315.29   | 126.26   | 302.79 | 0.20  |
| BC <sub>9</sub>  | 324.05   | 57.60    | 324.47   | 122.69   | 306.31 | 0.20  |
| BC <sub>11</sub> | 325.05   | 62.92    | 325.78   | 131.57   | 313.48 | 0.19  |

**Table S4** The variation of lattice constants ( $a$ ,  $b$  in Å) for the five K adsorbed B–C monolayers as a function of K concentration.

| Material         | K concentration                 | $a$   | $b$    | % change in $a$ | % change in $b$ | Average change in the $ab$ plane |
|------------------|---------------------------------|-------|--------|-----------------|-----------------|----------------------------------|
| BC <sub>6</sub>  | K <sub>0</sub> BC <sub>6</sub>  | 6.689 | 6.689  |                 |                 |                                  |
|                  | K <sub>1</sub> BC <sub>6</sub>  | 6.713 | 6.725  | 0.359           | 0.538           | 0.449                            |
|                  | K <sub>2</sub> BC <sub>6</sub>  | 6.726 | 6.730  | 0.553           | 0.613           | 0.583                            |
|                  | K <sub>3</sub> BC <sub>6</sub>  | 6.763 | 6.766  | 1.106           | 1.151           | 1.129                            |
|                  | K <sub>4</sub> BC <sub>6</sub>  | 6.758 | 6.762  | 1.032           | 1.091           | 1.062                            |
| BC <sub>7</sub>  | K <sub>0</sub> BC <sub>7</sub>  | 5.040 | 8.752  |                 |                 |                                  |
|                  | K <sub>1</sub> BC <sub>7</sub>  | 5.061 | 8.783  | 0.417           | 0.354           | 0.386                            |
|                  | K <sub>2</sub> BC <sub>7</sub>  | 5.058 | 8.773  | 0.357           | 0.240           | 0.299                            |
|                  | K <sub>3</sub> BC <sub>7</sub>  | 5.058 | 8.775  | 0.357           | 0.263           | 0.310                            |
|                  | K <sub>4</sub> BC <sub>7</sub>  | 5.050 | 8.783  | 0.198           | 0.354           | 0.276                            |
|                  | K <sub>5</sub> BC <sub>7</sub>  | 5.048 | 8.762  | 0.159           | 0.114           | 0.137                            |
| BC <sub>8</sub>  | K <sub>0</sub> BC <sub>8</sub>  | 7.542 | 7.542  |                 |                 |                                  |
|                  | K <sub>1</sub> BC <sub>8</sub>  | 7.576 | 7.576  | 0.451           | 0.451           | 0.451                            |
|                  | K <sub>2</sub> BC <sub>8</sub>  | 7.577 | 7.578  | 0.464           | 0.477           | 0.471                            |
|                  | K <sub>3</sub> BC <sub>8</sub>  | 7.588 | 7.588  | 0.610           | 0.610           | 0.610                            |
|                  | K <sub>4</sub> BC <sub>8</sub>  | 7.593 | 7.594  | 0.676           | 0.689           | 0.683                            |
|                  | K <sub>5</sub> BC <sub>8</sub>  | 7.594 | 7.595  | 0.689           | 0.703           | 0.696                            |
|                  | K <sub>6</sub> BC <sub>8</sub>  | 7.604 | 7.604  | 0.822           | 0.822           | 0.822                            |
|                  | K <sub>7</sub> BC <sub>8</sub>  | 7.608 | 7.609  | 0.875           | 0.888           | 0.882                            |
| BC <sub>9</sub>  | K <sub>0</sub> BC <sub>9</sub>  | 4.343 | 12.552 |                 |                 |                                  |
|                  | K <sub>2</sub> BC <sub>9</sub>  | 4.365 | 12.583 | 0.507           | 0.247           | 0.377                            |
|                  | K <sub>4</sub> BC <sub>9</sub>  | 4.367 | 12.610 | 0.553           | 0.462           | 0.508                            |
|                  | K <sub>6</sub> BC <sub>9</sub>  | 4.374 | 12.601 | 0.714           | 0.390           | 0.552                            |
|                  | K <sub>7</sub> BC <sub>9</sub>  | 4.378 | 12.600 | 0.806           | 0.382           | 0.594                            |
| BC <sub>11</sub> | K <sub>0</sub> BC <sub>11</sub> | 7.515 | 4.327  |                 |                 |                                  |
|                  | K <sub>2</sub> BC <sub>11</sub> | 7.530 | 4.352  | 0.200           | 0.578           | 0.389                            |
|                  | K <sub>4</sub> BC <sub>11</sub> | 7.555 | 4.360  | 0.532           | 0.763           | 0.648                            |
|                  | K <sub>6</sub> BC <sub>11</sub> | 7.549 | 4.364  | 0.452           | 0.855           | 0.654                            |
|                  | K <sub>8</sub> BC <sub>11</sub> | 7.571 | 4.370  | 0.745           | 0.994           | 0.870                            |

**Table S5** The elastic constants ( $C_{ij}$  in N/m), average Young's modulus ( $E$  in N/m), and average Poisson's ratios ( $\nu$ ) of the five fully potassiated B–C monolayers. The values of  $C_{ij}$  satisfy the Born criteria, indicating mechanical stability.

|                  | $C_{11}$ | $C_{12}$ | $C_{22}$ | $C_{66}$ | $E$    | $\nu$ |
|------------------|----------|----------|----------|----------|--------|-------|
| BC <sub>6</sub>  | 280.83   | 58.12    | 280.83   | 111.35   | 268.80 | 0.21  |
| BC <sub>7</sub>  | 309.39   | 56.69    | 311.14   | 121.98   | 296.48 | 0.19  |
| BC <sub>8</sub>  | 297.61   | 57.60    | 297.61   | 120.00   | 286.46 | 0.19  |
| BC <sub>9</sub>  | 310.71   | 54.92    | 314.41   | 118.83   | 295.70 | 0.20  |
| BC <sub>11</sub> | 308.65   | 57.13    | 307.95   | 126.20   | 298.15 | 0.18  |

## References

1. Y. Wang, J. Lv, L. Zhu and Y. Ma, *Phys. Rev. B*, 2010, **82**, 094116.
2. Y. Wang, J. Lv, L. Zhu and Y. Ma, *Computer. Phys. Commun.*, 2012, **183**, 2063-2070.
3. X. Yu, X. Chen, X. Wang, Z. Yuan, J. Feng and J. Rong, *Chem. Eng. J.*, 2021, **406**, 126812.
4. H.-B. Cao, X.-H. Wang, X. Xiong, C.-S. Liu and X.-J. Ye, *Appl. Phys. Lett.*, 2024, **124**, 073908.
5. G. Kresse and J. Furthmüller, *Phys. Rev. B*, 1996, **54**, 11169.
6. J. P. Perdew, K. Burke and M. Ernzerhof, *Phys. Rev. Lett.*, 1996, **77**, 3865-3868.
7. [https://github.com/tamaswells/VASP\\_script/blob/master/scan\\_adsorption\\_energy.py](https://github.com/tamaswells/VASP_script/blob/master/scan_adsorption_energy.py).
8. B. Feng, Z. Ding, S. Meng, Y. Yao, X. He, P. Cheng, L. Chen and K. Wu, *Nano. Lett.*, 2012, **12**, 3507-3511.
9. A. Fleurence, R. Friedlein, T. Ozaki, H. Kawai, Y. Wang and Y. Yamada-Takamura, *Phys. Rev. Lett.*, 2012, **108**, 245501.
10. H. Liu, A. T. Neal, Z. Zhu, Z. Luo, X. Xu, D. Tománek and P. D. Ye, *ACS Nano*, 2014, **8**, 4033-4041.
11. D. Li, M. Chen, Z. Sun, P. Yu, Z. Liu, P. M. Ajayan and Z. Zhang, *Nat. Nanotechnol.*, 2017, **12**, 901-906.
12. M. You, G. Guo, Y. Liao, S. Luo, C. He, C. Tang and J. Zhong, *J. Energy Storage*, 2024, **84**, 111004.
13. H. Zhang, Y. Liao, G. Yang and X. Zhou, *ACS Omega*, 2018, **3**, 10517-10525.
14. D. Fan, S. Lu, Y. Guo and X. Hu, *J. Mater. Chem. C*, 2018, **6**, 1651-1658.
15. D. Das, R. P. Hardikar, S. S. Han, K. R. Lee and A. K. Singh, *Phys. Chem. Chem. Phys.*, 2017, **19**, 24230-24239.
16. S. Gong and Q. Wang, *J. Phys. Chem. C*, 2017, **121**, 24418-24424.
17. A. P. Durajski and G. T. Kasprzak, *Physica B*, 2023, **660**, 414902.
